# Supplementary material
Source: MDPI journal article supplement (https://www.mdpi.com/2075-4701/8/2/107)
Supplement: s1 [file s1]

Alkaline Metal Reagent-Assisted Synthesis of Monodisperse Iron Oxide Nanostructures

Kwan Lee 1, Sangyeob Lee 2, Min Chul Oh 1 and Byungmin Ahn 1,*


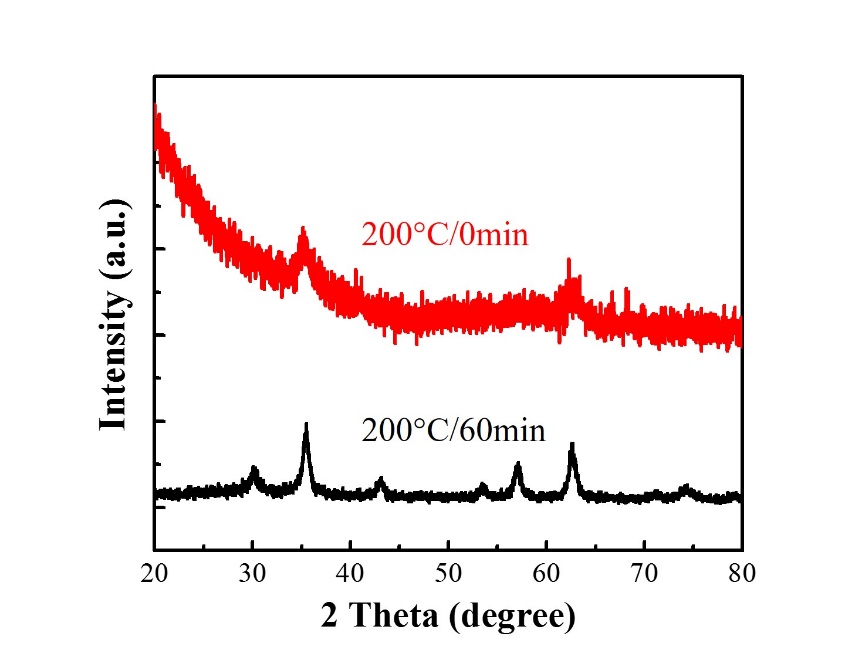


**Figure S1.** XRD measurement confirmed the crystalline structure of magnetite nanoparticles with two samples from initial stage (Red line, 200 °C, 0 min) and final state (black line, 200 °C, 60 min) of the reaction.


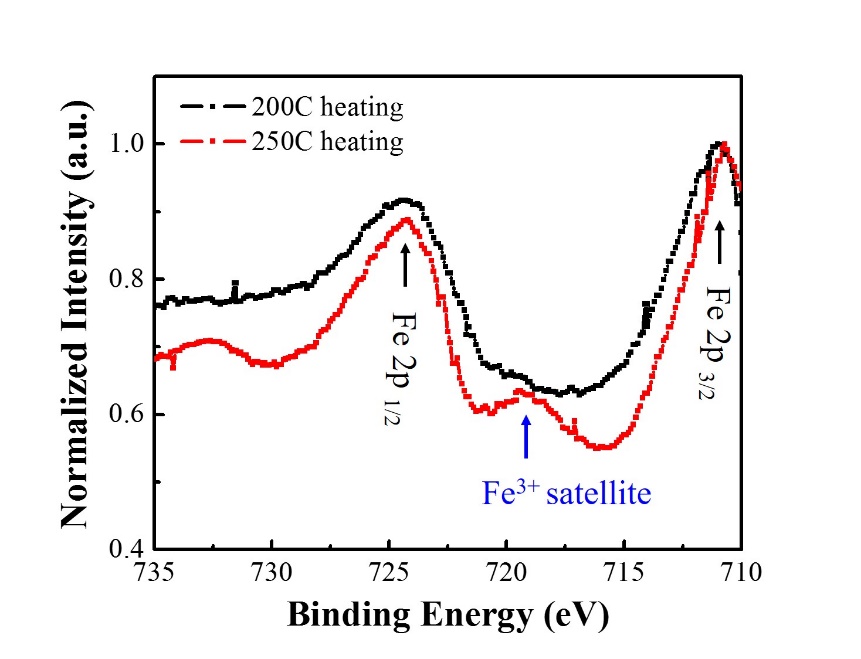


**Figure S2.** The oxidation state of iron at the outer surfaces of the synthesized nanoparticles was further investigated by XPS. While the complex structure of nanoscale samples prevents us from performing a full quantitative deconvolution of the Fe 2p spectra, the main Fe 2p peaks (black arrows) with the characteristic peak profile are observed for two samples which was heated at 200 °C and 250 °C respectively and indicates that the surface of the NPs is predominantly Fe3+.A satellite feature at 718.5 eV (blue arrow) is clearly observed for 250 °C heating condition and this satellite is most pronounced for pure Fe2O3 and is not observed for pure Fe3O4.


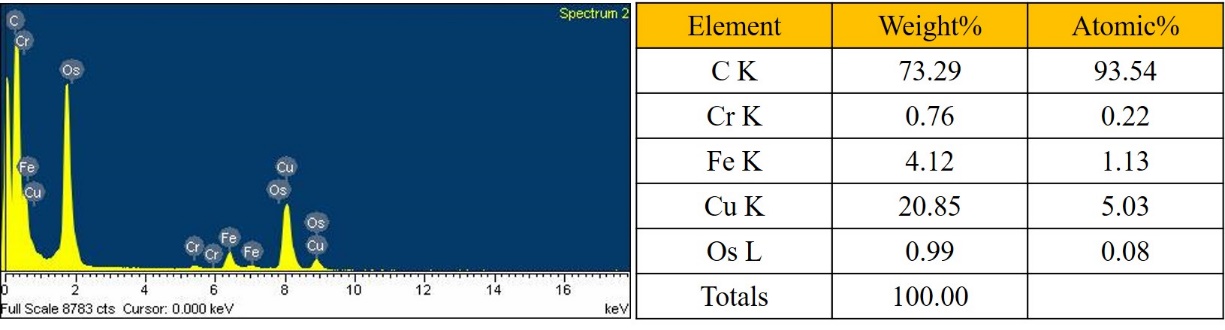


**Figure S3.** Energy Dispersive Spectroscopy (EDS) analysis of synthesized magnetite nanoparticles which was cleaned with a mixture of toluene/ethanol several times. No alkaline metal element was detected.


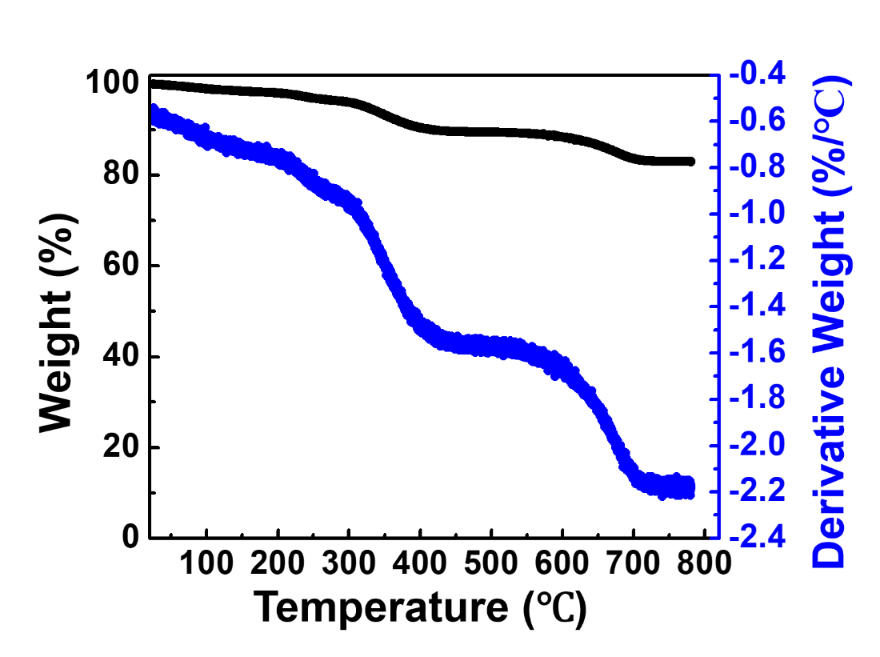


**Figure S4.** TGA of Fe3O4 nanoparticles synthesized with assistance of alkaline metal reagents


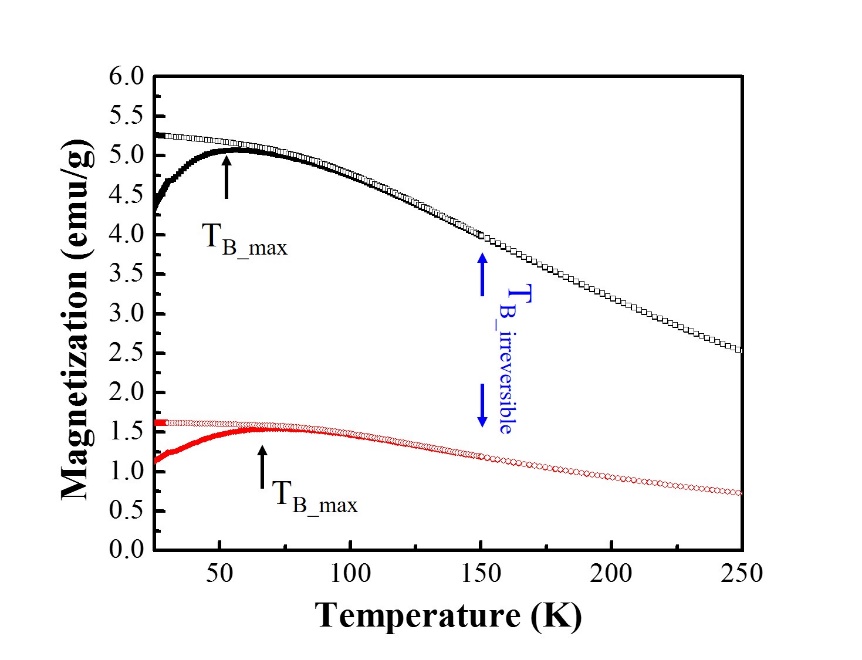


**Figure S5.** ZFC-FC measurement of different size of magnetite nanoparticles


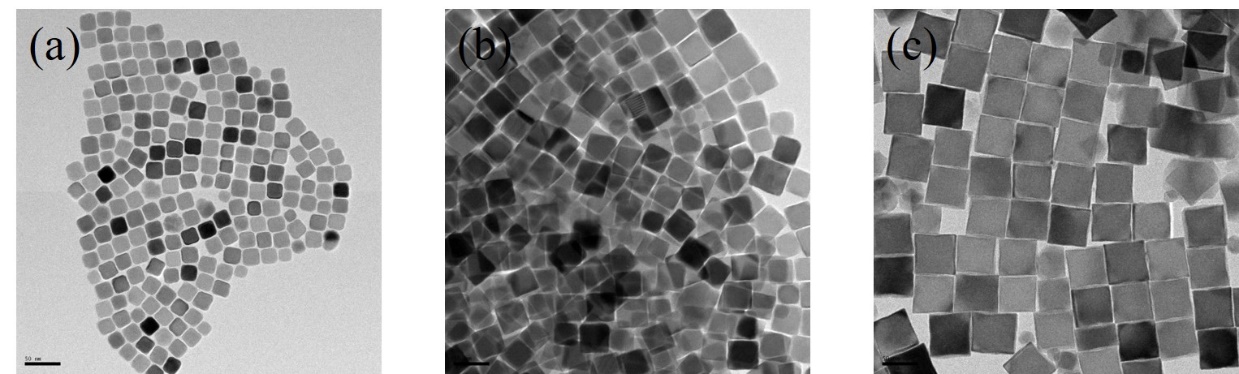


**Figure S6.** Low magnification TEM images of magnetite nanocubes assisted by alkaline metal ions reductions. Various reagent concentration and reaction time enable the size control of magnetite nanocubes with the size distribution of (a) 22±1.2 nm, (b) 36±2.5 nm, and (c) 57±5.1 nm in edge length. Scare bar is 50 nm.


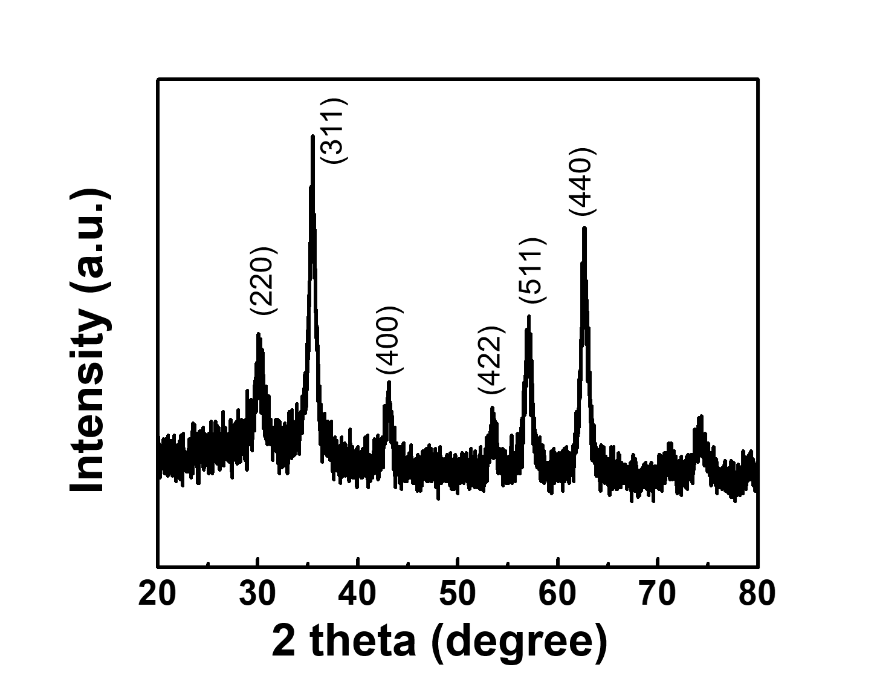


**Figure S7.** XRD measurement of Fe3O4 nanocubes confirmed as inverse spinel cubic structures.


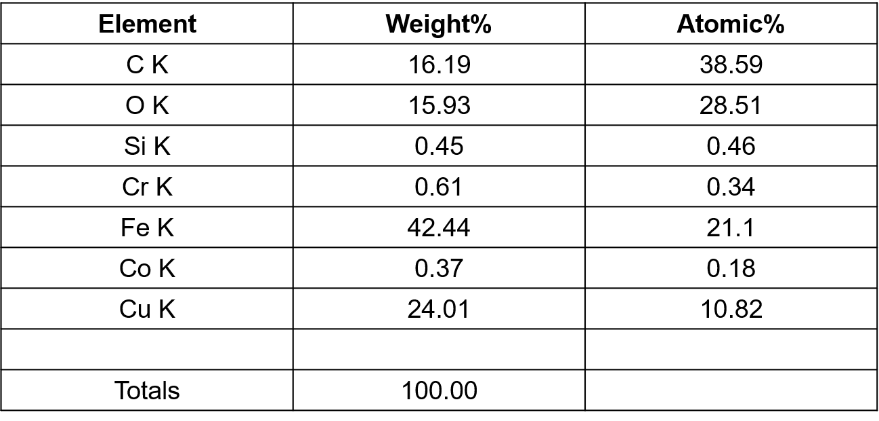


**Figure S8.** Energy Dispersive Spectroscopy (EDS) analysis of synthesized magnetite nanocubes.

References

1. G. Morrison and H.-C. zur Loye, *Journal of Solid State Chemistry*, 2015, **221**, 334-337.
2. S. Mondini, S. Cenedese, G. Marinoni, G. Molteni, N. Santo, C. L. Bianchi and A. Ponti, *Journal of Colloid and Interface Science*, 2008, **322**, 173-179.
3. T. Fujii, F. M. F. de Groot, G. A. Sawatzky, F. C. Voogt, T. Hibma and K. Okada, *Physical Review B*, 1999, **59**, 3195-3202.
